# Supplementary material for: Secular trend of gout incidence in the UK: an age-period-cohort analysis
Source: HighWire-hosted journal article supplement (doi:10.1136/bmjopen-2023-079665), 2024-01-01
Supplement: bmjopen-2023-079665supp001_data_supplement.pdf [file bmjopen-2023-079665supp001_data_supplement.pdf]

**Table Legends****Table S1 The lexis diagram of data for the APC model in the whole population****Table S2 Crude and age-standardized incidence rate of gout by sex and calendar year****Table S3 Age and period-adjusted rate ratio of incident gout for the birth cohort in men and women****Table S4 Age and period-adjusted rate ratio of re-defined incident gout for the birth cohort in men and women****Table S5 Period and birth cohort-adjusted rate ratio of incident gout for the age in men and women****Table S6 Age and birth cohort -adjusted rate ratio of incident gout for the period in men and women**

Table S1 The lexis diagram of data for the APC model in the whole population

| Birth cohort            | Age   |       |       |       |       |       |       |       |       |       |       |       |       |       |       |       |       |       |       |       | Period    |
|-------------------------|-------|-------|-------|-------|-------|-------|-------|-------|-------|-------|-------|-------|-------|-------|-------|-------|-------|-------|-------|-------|-----------|
|                         | 30-32 | 33-35 | 36-38 | 39-41 | 42-44 | 45-47 | 48-50 | 51-53 | 54-56 | 57-59 | 60-62 | 63-65 | 66-68 | 69-71 | 72-74 | 75-77 | 78-80 | 81-83 | 84-86 | 87-89 |           |
| 1910-1914 (1912)        | NA    | 3.79  | 1999-2001 |
| 1913-1917 (1915)        | NA    | 4.42  | 4.75  | 2002-2004 |
| 1916-1920 (1918)        | NA    | 4.46  | 5.04  | 4.78  | 2005-2007 |
| 1919-1923 (1921)        | NA    | 5.02  | 5.84  | 5.85  | 5.55  | 2008-2010 |
| 1922-1926 (1924)        | NA    | 4.64  | 5.65  | 6.31  | 6.13  | 5.85  | 5.85  | 2011-2013 |
| 1925-1929 (1927)        | NA    | 4.59  | 5.48  | 6.11  | 6.16  | 6.44  | 5.80  | 2014-2016 |
| 1928-1932 (1930)        | NA    | 4.16  | 5.38  | 6.04  | 6.51  | 6.80  | 5.83  | 4.88  | 2017-2019 |
| 1931-1935 (1933)        | NA    | 3.58  | 4.88  | 5.57  | 6.43  | 6.73  | 5.98  | 5.78  | NA    | NA        |
| 1934-1938 (1936)        | NA    | 3.46  | 4.33  | 5.13  | 5.99  | 6.62  | 6.44  | 5.14  | NA    | NA    | NA        |
| 1937-1941 (1939)        | NA    | 3.10  | 3.78  | 4.68  | 5.34  | 5.91  | 6.12  | 5.28  | NA    | NA    | NA    | NA        |
| 1940-1944 (1942)        | NA    | 2.68  | 3.40  | 3.95  | 4.67  | 5.36  | 5.47  | 4.84  | NA    | NA    | NA    | NA    | NA        |
| 1943-1947 (1945)        | NA    | 2.40  | 3.00  | 3.54  | 3.92  | 4.74  | 4.84  | 4.65  | NA    | NA    | NA    | NA    | NA    | NA        |
| 1946-1950 (1948)        | NA    | 2.19  | 2.73  | 3.26  | 3.58  | 4.15  | 4.48  | 4.06  | NA        |
| <b>1949-1953 (1951)</b> | NA    | NA    | NA    | NA    | NA    | NA    | 1.81  | 2.38  | 2.86  | 3.14  | 3.69  | 3.90  | 3.69  | NA        |
| 1952-1956 (1954)        | NA    | NA    | NA    | NA    | NA    | 1.64  | 2.14  | 2.63  | 2.83  | 3.35  | 3.55  | 3.61  | NA        |
| 1955-1959 (1957)        | NA    | NA    | NA    | NA    | 1.41  | 1.94  | 2.30  | 2.58  | 2.95  | 3.26  | 3.32  | NA        |
| 1958-1962 (1960)        | NA    | NA    | NA    | 1.15  | 1.62  | 1.91  | 2.17  | 2.60  | 2.81  | 2.92  | NA        |
| 1961-1965 (1963)        | NA    | NA    | 0.92  | 1.31  | 1.52  | 1.93  | 2.30  | 2.60  | 2.87  | NA        |

| Birth cohort     | Age   |       |       |       |       |       |       |       |       |       |       |       |       |       |       |       |       |       |       |       | Period |
|------------------|-------|-------|-------|-------|-------|-------|-------|-------|-------|-------|-------|-------|-------|-------|-------|-------|-------|-------|-------|-------|--------|
|                  | 30-32 | 33-35 | 36-38 | 39-41 | 42-44 | 45-47 | 48-50 | 51-53 | 54-56 | 57-59 | 60-62 | 63-65 | 66-68 | 69-71 | 72-74 | 75-77 | 78-80 | 81-83 | 84-86 | 87-89 |        |
| 1964-1968 (1966) | NA    | 0.67  | 1.02  | 1.35  | 1.68  | 2.05  | 2.26  | 2.42  | NA     |
| 1967-1971 (1969) | 0.55  | 0.82  | 1.10  | 1.37  | 1.78  | 1.99  | 2.14  | NA     |
| 1970-1974 (1972) | 0.50  | 0.87  | 1.19  | 1.50  | 1.79  | 1.86  | NA     |
| 1973-1977 (1975) | 0.62  | 0.96  | 1.31  | 1.50  | 1.78  | NA     |
| 1976-1980 (1978) | 0.66  | 0.99  | 1.41  | 1.46  | NA     |
| 1979-1983 (1981) | 0.84  | 1.14  | 1.44  | NA     |
| 1982-1986 (1984) | 0.87  | 1.23  | NA     |
| 1985-1989 (1987) | 0.94  | NA     |

NA, not applicable. Note: Cells denote the incidence rate (per 1000 person-year) of each age category from the corresponding period in the whole population. For instance, the incidence rate of age 87-89 years in 1999-2001 is filled in the square (3.79), and this square belongs to the birth cohort 1910-1914. The age-specific incidence rate of gout between 2011-2019 was highlighted. During this period, participants born in the late birth cohorts had lower age-specific gout incidence than in the early birth cohorts among participants born in 1922-1980. However, there is an increasing trend of gout incidence in the latest birth cohorts (born in 1979-1989, marked in red).

**Table S2 Crude and age-standardized incidence rate of gout by sex and calendar year**

| Calendar year | Men   |              |                  |      | Women |              |                 |      |
|---------------|-------|--------------|------------------|------|-------|--------------|-----------------|------|
|               | Cases | Follow years | Crude incidence* | ASR  | Cases | Follow years | Crude incidence | ASR  |
| 1999          | 2744  | 835707       | 3.28             | 3.31 | 972   | 907045       | 1.07            | 1.03 |
| 2000          | 3279  | 966402       | 3.39             | 3.43 | 1074  | 1042813      | 1.03            | 1.00 |
| 2001          | 4468  | 1192729      | 3.75             | 3.78 | 1506  | 1283066      | 1.17            | 1.15 |
| 2002          | 5065  | 1321333      | 3.83             | 3.85 | 1709  | 1417024      | 1.21            | 1.18 |
| 2003          | 5719  | 1416952      | 4.04             | 4.04 | 1913  | 1514802      | 1.26            | 1.24 |
| 2004          | 6021  | 1477882      | 4.07             | 4.08 | 2153  | 1577274      | 1.37            | 1.34 |
| 2005          | 6848  | 1557665      | 4.40             | 4.38 | 2264  | 1664724      | 1.36            | 1.32 |
| 2006          | 6851  | 1607727      | 4.26             | 4.22 | 2443  | 1719249      | 1.42            | 1.38 |
| 2007          | 6764  | 1631480      | 4.15             | 4.08 | 2389  | 1746392      | 1.37            | 1.33 |
| 2008          | 7251  | 1672041      | 4.34             | 4.24 | 2623  | 1793931      | 1.46            | 1.42 |
| 2009          | 7531  | 1686883      | 4.46             | 4.36 | 2611  | 1813348      | 1.44            | 1.39 |
| 2010          | 7294  | 1654109      | 4.41             | 4.31 | 2543  | 1780030      | 1.43            | 1.38 |
| 2011          | 7343  | 1637520      | 4.48             | 4.36 | 2628  | 1770916      | 1.48            | 1.43 |
| 2012          | 7308  | 1627202      | 4.49             | 4.36 | 2867  | 1764087      | 1.63            | 1.57 |
| 2013          | 7471  | 1571752      | 4.75             | 4.59 | 2843  | 1706813      | 1.67            | 1.60 |
| 2014          | 6892  | 1474079      | 4.68             | 4.49 | 2613  | 1600982      | 1.63            | 1.55 |
| 2015          | 5702  | 1308643      | 4.36             | 4.19 | 2165  | 1421392      | 1.52            | 1.45 |
| 2016          | 4780  | 1137601      | 4.20             | 4.05 | 1818  | 1235488      | 1.47            | 1.40 |
| 2017          | 4316  | 1028497      | 4.20             | 4.06 | 1608  | 1111828      | 1.45            | 1.38 |
| 2018          | 3972  | 961175       | 4.13             | 4.01 | 1397  | 1037633      | 1.35            | 1.29 |
| 2019          | 3524  | 899297       | 3.92             | 3.77 | 1219  | 970272       | 1.26            | 1.19 |

ASR, age-standardized rate.

\*Incidence rate is presented as crude incidence per 1000 person-years, with age distribution in 2011-2013 as the standard.

**Table S3 Age and period-adjusted rate ratio of incident gout for the birth cohort in men and women**

| Birth cohort            | 1999-2013               |                         | 2011-2019               |                         |
|-------------------------|-------------------------|-------------------------|-------------------------|-------------------------|
|                         | Men                     | Women                   | Men                     | Women                   |
| 1910-1914 (1912)        | 0.47 (0.38, 0.58)       | 0.32 (0.26, 0.40)       | NA                      | NA                      |
| 1913-1917 (1915)        | 0.51 (0.45, 0.58)       | 0.38 (0.33, 0.44)       | NA                      | NA                      |
| 1916-1920 (1918)        | 0.56 (0.51, 0.62)       | 0.37 (0.33, 0.42)       | NA                      | NA                      |
| 1919-1923 (1921)        | 0.64 (0.59, 0.69)       | 0.46 (0.41, 0.51)       | NA                      | NA                      |
| 1922-1926 (1924)        | 0.67 (0.63, 0.72)       | 0.49 (0.44, 0.54)       | 3.33 (2.68, 4.14)       | 2.56 (2.02, 3.24)       |
| 1925-1929 (1927)        | 0.69 (0.65, 0.74)       | 0.53 (0.48, 0.59)       | 2.67 (2.26, 3.16)       | 2.69 (2.21, 3.27)       |
| 1928-1932 (1930)        | 0.76 (0.71, 0.80)       | 0.59 (0.54, 0.65)       | 2.30 (1.99, 2.65)       | 2.56 (2.14, 3.06)       |
| 1931-1935 (1933)        | 0.78 (0.74, 0.83)       | 0.65 (0.59, 0.71)       | 2.10 (1.85, 2.37)       | 2.22 (1.88, 2.61)       |
| 1934-1938 (1936)        | 0.83 (0.79, 0.87)       | 0.73 (0.67, 0.80)       | 1.83 (1.65, 2.04)       | 2.04 (1.76, 2.37)       |
| 1937-1941 (1939)        | 0.85 (0.81, 0.89)       | 0.82 (0.75, 0.89)       | 1.60 (1.46, 1.76)       | 1.75 (1.53, 2.00)       |
| 1940-1944 (1942)        | 0.88 (0.85, 0.92)       | 0.85 (0.78, 0.92)       | 1.41 (1.30, 1.53)       | 1.50 (1.33, 1.69)       |
| 1943-1947 (1945)        | 0.91 (0.88, 0.95)       | 0.90 (0.83, 0.97)       | 1.27 (1.19, 1.36)       | 1.25 (1.13, 1.38)       |
| 1946-1950 (1948)        | 0.98 (0.95, 1.01)       | 0.95 (0.89, 1.02)       | 1.13 (1.07, 1.19)       | 1.10 (1.01, 1.19)       |
| <b>1949-1953 (1951)</b> | <b>1.00 (reference)</b> | <b>1.00 (reference)</b> | <b>1.00 (reference)</b> | <b>1.00 (reference)</b> |
| 1952-1956 (1954)        | 1.06 (1.02, 1.10)       | 1.13 (1.05, 1.22)       | 0.95 (0.89, 1.00)       | 0.96 (0.88, 1.06)       |
| 1955-1959 (1957)        | 1.12 (1.07, 1.17)       | 1.20 (1.10, 1.31)       | 0.89 (0.83, 0.95)       | 0.93 (0.83, 1.04)       |
| 1958-1962 (1960)        | 1.15 (1.10, 1.20)       | 1.14 (1.02, 1.26)       | 0.84 (0.78, 0.91)       | 0.81 (0.71, 0.94)       |
| 1961-1965 (1963)        | 1.19 (1.13, 1.25)       | 1.25 (1.10, 1.41)       | 0.83 (0.76, 0.91)       | 0.89 (0.76, 1.05)       |
| 1964-1968 (1966)        | 1.27 (1.20, 1.34)       | 1.38 (1.20, 1.59)       | 0.79 (0.72, 0.87)       | 0.86 (0.71, 1.04)       |
| 1967-1971 (1969)        | 1.35 (1.27, 1.44)       | 1.74 (1.49, 2.05)       | 0.75 (0.67, 0.84)       | 0.86 (0.69, 1.08)       |
| 1970-1974 (1972)        | 1.47 (1.37, 1.58)       | 1.71 (1.41, 2.07)       | 0.73 (0.65, 0.82)       | 0.85 (0.66, 1.10)       |
| 1973-1977 (1975)        | 1.69 (1.56, 1.83)       | 1.73 (1.37, 2.17)       | 0.73 (0.64, 0.83)       | 0.77 (0.57, 1.04)       |
| 1976-1980 (1978)        | 1.86 (1.68, 2.05)       | 1.61 (1.19, 2.17)       | 0.74 (0.64, 0.86)       | 0.69 (0.48, 0.98)       |
| 1979-1983 (1981)        | 2.43 (2.14, 2.76)       | 2.33 (1.59, 3.41)       | 0.82 (0.70, 0.95)       | 0.85 (0.56, 1.27)       |
| 1982-1986 (1984)        | NA                      | NA                      | 0.86 (0.72, 1.02)       | 1.12 (0.71, 1.78)       |
| 1985-1989 (1987)        | NA                      | NA                      | 0.94 (0.77, 1.15)       | 0.98 (0.55, 1.75)       |

NA, not applicable.

**Table S4 Age and period-adjusted rate ratio of re-defined incident gout for the birth cohort in men and women\***

| Birth cohort            | 1999-2013               |                         |                         | 2011-2019               |                         |                         |
|-------------------------|-------------------------|-------------------------|-------------------------|-------------------------|-------------------------|-------------------------|
|                         | Total                   | Men                     | Women                   | Total                   | Men                     | Women                   |
| 1910-1914 (1912)        | 0.21 (0.18, 0.26)       | 0.24 (0.18, 0.31)       | 0.19 (0.15, 0.25)       | NA                      | NA                      | NA                      |
| 1913-1917 (1915)        | 0.27 (0.24, 0.30)       | 0.29 (0.25, 0.34)       | 0.25 (0.21, 0.29)       | NA                      | NA                      | NA                      |
| 1916-1920 (1918)        | 0.28 (0.26, 0.31)       | 0.33 (0.29, 0.37)       | 0.24 (0.21, 0.28)       | NA                      | NA                      | NA                      |
| 1919-1923 (1921)        | 0.35 (0.32, 0.37)       | 0.38 (0.34, 0.42)       | 0.31 (0.27, 0.35)       | NA                      | NA                      | NA                      |
| 1922-1926 (1924)        | 0.39 (0.36, 0.41)       | 0.43 (0.39, 0.47)       | 0.33 (0.29, 0.38)       | 2.51 (2.03, 3.11)       | 2.96 (2.26, 3.87)       | 2.49 (1.82, 3.40)       |
| 1925-1929 (1927)        | 0.43 (0.40, 0.45)       | 0.45 (0.42, 0.49)       | 0.38 (0.33, 0.43)       | 2.43 (2.05, 2.88)       | 2.39 (1.95, 2.94)       | 2.71 (2.10, 3.51)       |
| 1928-1932 (1930)        | 0.49 (0.46, 0.52)       | 0.52 (0.49, 0.56)       | 0.43 (0.38, 0.49)       | 2.17 (1.87, 2.51)       | 2.01 (1.69, 2.39)       | 2.54 (2.01, 3.21)       |
| 1931-1935 (1933)        | 0.55 (0.52, 0.58)       | 0.57 (0.53, 0.61)       | 0.50 (0.44, 0.56)       | 1.92 (1.69, 2.19)       | 1.82 (1.57, 2.11)       | 2.17 (1.76, 2.68)       |
| 1934-1938 (1936)        | 0.62 (0.59, 0.65)       | 0.62 (0.58, 0.66)       | 0.59 (0.53, 0.66)       | 1.74 (1.55, 1.96)       | 1.63 (1.43, 1.86)       | 1.97 (1.63, 2.38)       |
| 1937-1941 (1939)        | 0.68 (0.65, 0.72)       | 0.68 (0.64, 0.72)       | 0.67 (0.60, 0.74)       | 1.54 (1.39, 1.71)       | 1.47 (1.31, 1.65)       | 1.68 (1.41, 1.99)       |
| 1940-1944 (1942)        | 0.75 (0.71, 0.78)       | 0.75 (0.71, 0.79)       | 0.72 (0.65, 0.79)       | 1.38 (1.27, 1.51)       | 1.35 (1.22, 1.49)       | 1.45 (1.25, 1.69)       |
| 1943-1947 (1945)        | 0.81 (0.78, 0.85)       | 0.80 (0.76, 0.84)       | 0.83 (0.75, 0.90)       | 1.23 (1.14, 1.32)       | 1.23 (1.13, 1.33)       | 1.22 (1.07, 1.39)       |
| 1946-1950 (1948)        | 0.92 (0.88, 0.96)       | 0.92 (0.88, 0.96)       | 0.89 (0.81, 0.96)       | 1.14 (1.07, 1.21)       | 1.14 (1.07, 1.22)       | 1.13 (1.02, 1.26)       |
| <b>1949-1953 (1951)</b> | <b>1.00 (reference)</b> |
| 1952-1956 (1954)        | 1.12 (1.08, 1.17)       | 1.11 (1.06, 1.16)       | 1.20 (1.09, 1.32)       | 0.98 (0.92, 1.05)       | 0.97 (0.91, 1.04)       | 1.00 (0.89, 1.13)       |
| 1955-1959 (1957)        | 1.26 (1.20, 1.32)       | 1.25 (1.19, 1.31)       | 1.34 (1.20, 1.50)       | 0.97 (0.89, 1.04)       | 0.97 (0.90, 1.06)       | 0.93 (0.80, 1.08)       |
| 1958-1962 (1960)        | 1.35 (1.28, 1.42)       | 1.35 (1.28, 1.43)       | 1.31 (1.14, 1.49)       | 0.96 (0.88, 1.06)       | 0.98 (0.89, 1.08)       | 0.88 (0.74, 1.06)       |
| 1961-1965 (1963)        | 1.50 (1.41, 1.59)       | 1.50 (1.41, 1.60)       | 1.57 (1.35, 1.84)       | 0.99 (0.89, 1.10)       | 1.00 (0.90, 1.12)       | 0.95 (0.76, 1.17)       |
| 1964-1968 (1966)        | 1.67 (1.56, 1.78)       | 1.68 (1.56, 1.80)       | 1.77 (1.47, 2.12)       | 0.99 (0.88, 1.12)       | 1.00 (0.89, 1.13)       | 0.97 (0.76, 1.24)       |
| 1967-1971 (1969)        | 1.95 (1.81, 2.10)       | 1.92 (1.77, 2.07)       | 2.57 (2.09, 3.16)       | 0.99 (0.87, 1.13)       | 1.01 (0.88, 1.16)       | 0.95 (0.71, 1.27)       |
| 1970-1974 (1972)        | 2.23 (2.05, 2.43)       | 2.24 (2.05, 2.44)       | 2.58 (2.01, 3.30)       | 1.02 (0.88, 1.18)       | 1.04 (0.89, 1.20)       | 0.96 (0.69, 1.35)       |
| 1973-1977 (1975)        | 2.74 (2.48, 3.01)       | 2.74 (2.47, 3.03)       | 3.14 (2.33, 4.23)       | 1.09 (0.93, 1.28)       | 1.12 (0.95, 1.32)       | 0.91 (0.61, 1.36)       |
| 1976-1980 (1978)        | 3.02 (2.68, 3.40)       | 3.10 (2.74, 3.51)       | 2.81 (1.90, 4.15)       | 1.13 (0.94, 1.35)       | 1.16 (0.97, 1.39)       | 0.89 (0.56, 1.43)       |
| 1979-1983 (1981)        | 4.46 (3.83, 5.19)       | 4.67 (3.97, 5.48)       | 2.33 (1.59, 3.41)       | 1.33 (1.09, 1.61)       | 1.37 (1.13, 1.67)       | 1.03 (0.60, 1.77)       |
| 1982-1986 (1984)        | NA                      | NA                      | NA                      | 1.49 (1.21, 1.85)       | 1.51 (1.22, 1.87)       | 1.64 (0.88, 3.03)       |
| 1985-1989 (1987)        | NA                      | NA                      | NA                      | 1.70 (1.32, 2.20)       | 1.73 (1.35, 2.23)       | 1.62 (0.74, 3.54)       |

NA, not applicable.

\* Re-defined incident gout was diagnosed by a combination of Read Code and the use of anti-gout medication.

**Table S5** Period and birth cohort-adjusted rate ratio of incident gout for the age in men and women

| Age          | 1999-2013               |                         |                         | 2011-2019               |                         |                         |
|--------------|-------------------------|-------------------------|-------------------------|-------------------------|-------------------------|-------------------------|
|              | Total                   | Men                     | Women                   | Total                   | Men                     | Women                   |
| 30-32        | 0.11 (0.11, 0.12)       | 0.13 (0.12, 0.14)       | 0.05 (0.04, 0.06)       | 0.28 (0.24, 0.33)       | 0.32 (0.28, 0.38)       | 0.11 (0.07, 0.17)       |
| 33-35        | 0.18 (0.17, 0.19)       | 0.20 (0.18, 0.21)       | 0.07 (0.06, 0.09)       | 0.38 (0.33, 0.45)       | 0.45 (0.39, 0.52)       | 0.13 (0.09, 0.19)       |
| 36-38        | 0.25 (0.23, 0.26)       | 0.28 (0.26, 0.30)       | 0.10 (0.09, 0.12)       | 0.51 (0.44, 0.58)       | 0.58 (0.51, 0.66)       | 0.22 (0.15, 0.30)       |
| 39-41        | 0.32 (0.31, 0.34)       | 0.36 (0.34, 0.39)       | 0.13 (0.11, 0.16)       | 0.56 (0.50, 0.64)       | 0.65 (0.58, 0.73)       | 0.23 (0.18, 0.31)       |
| 42-44        | 0.41 (0.39, 0.43)       | 0.45 (0.43, 0.48)       | 0.20 (0.18, 0.23)       | 0.67 (0.60, 0.74)       | 0.74 (0.67, 0.82)       | 0.35 (0.28, 0.45)       |
| 45-47        | 0.51 (0.49, 0.53)       | 0.56 (0.53, 0.59)       | 0.28 (0.25, 0.32)       | 0.72 (0.66, 0.79)       | 0.80 (0.73, 0.87)       | 0.39 (0.33, 0.48)       |
| 48-50        | 0.61 (0.58, 0.63)       | 0.66 (0.63, 0.69)       | 0.38 (0.34, 0.42)       | 0.78 (0.72, 0.84)       | 0.85 (0.79, 0.92)       | 0.50 (0.42, 0.58)       |
| 51-53        | 0.73 (0.70, 0.76)       | 0.75 (0.73, 0.78)       | 0.59 (0.54, 0.64)       | 0.87 (0.81, 0.92)       | 0.90 (0.84, 0.96)       | 0.72 (0.64, 0.82)       |
| 54-56        | 0.85 (0.82, 0.87)       | 0.85 (0.82, 0.88)       | 0.80 (0.75, 0.85)       | 0.94 (0.90, 0.98)       | 0.94 (0.90, 0.99)       | 0.92 (0.84, 1.00)       |
| <b>57-59</b> | <b>1.00 (reference)</b> |
| 60-62        | 1.17 (1.14, 1.21)       | 1.15 (1.12, 1.19)       | 1.30 (1.23, 1.38)       | 1.04 (0.99, 1.10)       | 1.02 (0.97, 1.08)       | 1.15 (1.05, 1.27)       |
| 63-65        | 1.36 (1.32, 1.40)       | 1.30 (1.25, 1.34)       | 1.71 (1.62, 1.82)       | 1.07 (1.00, 1.14)       | 1.01 (0.95, 1.09)       | 1.30 (1.15, 1.46)       |
| 66-68        | 1.65 (1.59, 1.71)       | 1.53 (1.47, 1.60)       | 2.29 (2.13, 2.46)       | 1.08 (0.99, 1.17)       | 0.99 (0.91, 1.08)       | 1.44 (1.26, 1.65)       |
| 69-71        | 1.95 (1.88, 2.03)       | 1.75 (1.67, 1.83)       | 3.06 (2.84, 3.30)       | 1.05 (0.96, 1.15)       | 0.95 (0.87, 1.05)       | 1.48 (1.28, 1.72)       |
| 72-74        | 2.30 (2.20, 2.39)       | 2.00 (1.90, 2.10)       | 3.89 (3.59, 4.22)       | 1.03 (0.94, 1.14)       | 0.92 (0.83, 1.02)       | 1.54 (1.31, 1.81)       |
| 75-77        | 2.63 (2.52, 2.76)       | 2.21 (2.10, 2.34)       | 4.94 (4.53, 5.38)       | 0.99 (0.89, 1.11)       | 0.89 (0.79, 0.99)       | 1.51 (1.27, 1.79)       |
| 78-80        | 2.91 (2.77, 3.06)       | 2.40 (2.26, 2.55)       | 5.77 (5.27, 6.32)       | 0.91 (0.81, 1.03)       | 0.80 (0.71, 0.91)       | 1.44 (1.20, 1.74)       |
| 81-83        | 3.13 (2.97, 3.31)       | 2.54 (2.38, 2.72)       | 6.59 (5.99, 7.25)       | 0.79 (0.70, 0.90)       | 0.70 (0.61, 0.81)       | 1.27 (1.05, 1.55)       |
| 84-86        | 3.23 (3.04, 3.43)       | 2.61 (2.42, 2.82)       | 7.09 (6.40, 7.86)       | 0.71 (0.62, 0.82)       | 0.60 (0.51, 0.71)       | 1.23 (0.99, 1.51)       |
| 87-89        | 3.14 (2.93, 3.37)       | 2.67 (2.43, 2.93)       | 6.89 (6.15, 7.72)       | 0.61 (0.51, 0.71)       | 0.47 (0.39, 0.57)       | 1.13 (0.90, 1.42)       |

**Table S6 Age and birth cohort -adjusted rate ratio of incident gout for the period in men and women**

| Calendar year    | 1999-2013               |                         |                         | 2011-2019               |                         |                         |
|------------------|-------------------------|-------------------------|-------------------------|-------------------------|-------------------------|-------------------------|
|                  | Total                   | Men                     | Women                   | Total                   | Men                     | Women                   |
| 1999-2001        | 0.78 (0.76, 0.79)       | 0.80 (0.78, 0.82)       | 0.72 (0.69, 0.75)       | NA                      | NA                      | NA                      |
| 2002-2004        | 0.89 (0.87, 0.90)       | 0.91 (0.89, 0.93)       | 0.84 (0.81, 0.87)       | NA                      | NA                      | NA                      |
| 2005-2007        | 0.94 (0.92, 0.96)       | 0.96 (0.94, 0.98)       | 0.89 (0.86, 0.92)       | NA                      | NA                      | NA                      |
| 2008-2010        | 0.96 (0.94, 0.98)       | 0.98 (0.96, 1.00)       | 0.92 (0.89, 0.94)       | NA                      | NA                      | NA                      |
| <b>2011-2013</b> | <b>1.00 (reference)</b> |
| 2014-2016        | NA                      | NA                      | NA                      | 0.96 (0.94, 0.98)       | 0.96 (0.94, 0.98)       | 0.99 (0.95, 1.02)       |
| 2017-2019        | NA                      | NA                      | NA                      | 0.88 (0.86, 0.90)       | 0.88 (0.86, 0.90)       | 0.88 (0.85, 0.92)       |

NA, not applicable.
